# Supplementary material for: Excellent microwave absorption properties based on a composite of one dimensional Mo2C@C nanorods and a PVDF matrix
Source: Royal Society of Chemistry journal article supplement (doi:10.1039/c9ra03362a), 2019-01-01
Supplement: c9ra03362a1.pdf [file c9ra03362a1.pdf]

## Supporting Information

### Excellent microwave absorption properties based on the composite of one dimensional Mo<sub>2</sub>C@C nanorods and PVDF matrix

Chao-Qin Li,<sup>a</sup> Xun Shen,<sup>a</sup> Ruo-Cheng Ding,<sup>b</sup> Guang-Sheng Wang<sup>\*b</sup>

<sup>a</sup> Engineering Research Center of High Performance Polymer and Molding Technology, Ministry of Education, Qingdao University of Science and Technology, Qingdao 266042, PR China

<sup>b</sup> School of Chemistry, Beihang University, Beijing 100191, PR China. E-mail: wanggsh@buaa.edu.cn

As shown in Figure S1, one can see that these Mo<sub>2</sub>C@C composites display two weight loss regions due to the removal of physically absorbed water (before 100 °C) and final oxidation of product under high temperature air atmosphere (after 500 °C). It is calculated that the relative contents of Mo<sub>2</sub>C and C in Mo<sub>2</sub>C@C are 94.4 and 5.6 wt%, respectively.

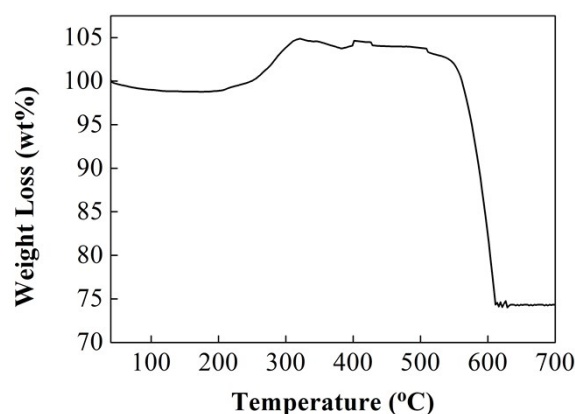

**Figure S1.** TG curves of Mo<sub>2</sub>C@C nanorods under air atmosphere

As presented under the yellow line, the effective absorption frequency (RL less than -10 dB) almost covers the half of measured frequency with any filler content.

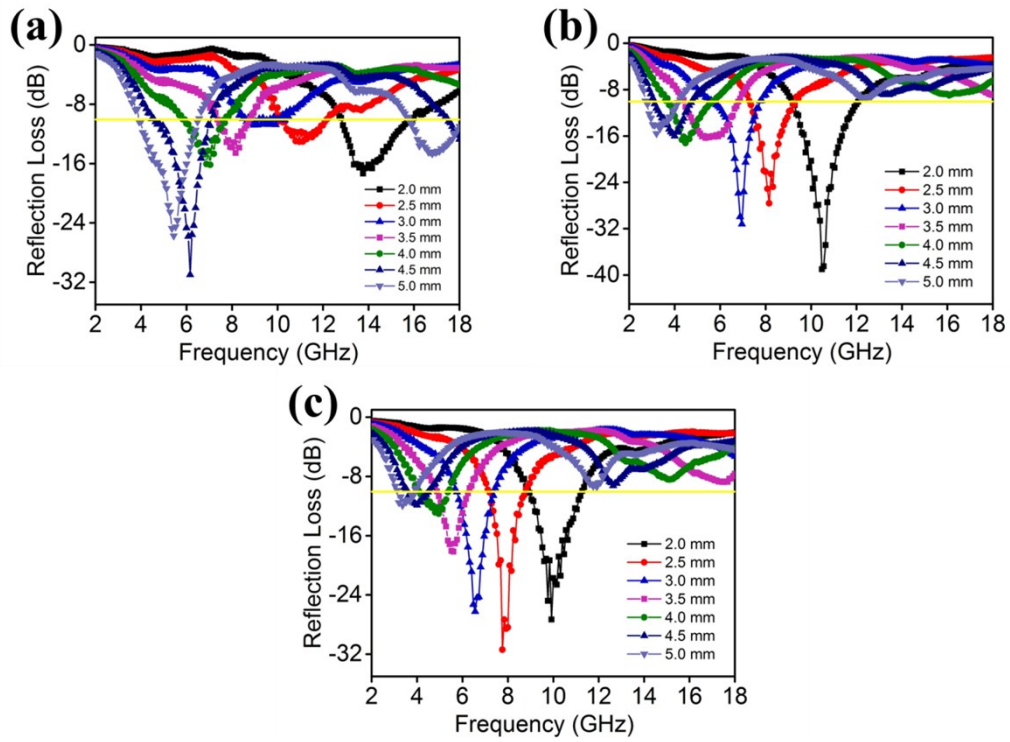

**Figure S2.** The RL curves of (a) 5 wt%, (b) 10 wt%, (c) 15 wt% Mo<sub>2</sub>C@C/PVDF in the thickness of 2.0-5.0 mm.

Two Cole-Cole semicircles are stood out by blue lines as below.

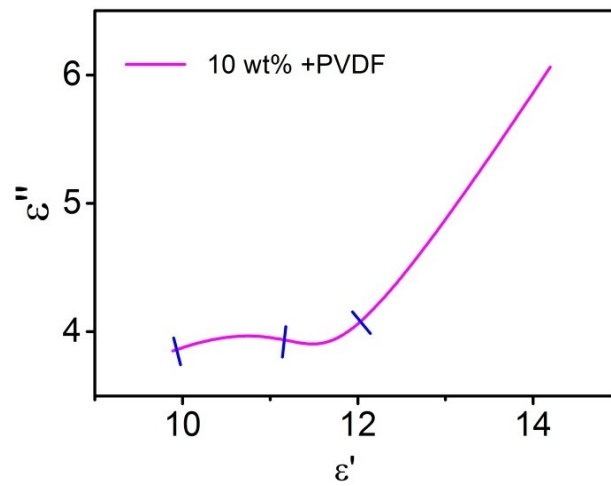

**Figure S3.** The corresponding plots of  $\epsilon''$  versus  $\epsilon'$  for 10 wt% Mo<sub>2</sub>C@C/PVDF.
